# Supplementary material for: The interaction of TRPV1 and lipids: Insights into lipid metabolism
Source: PubMed Central journal article supplement (PMC9797668; doi:10.3389/fphys.2022.1066023), 2022-12-15
Supplement: Image1.pdf [file Image1.pdf]

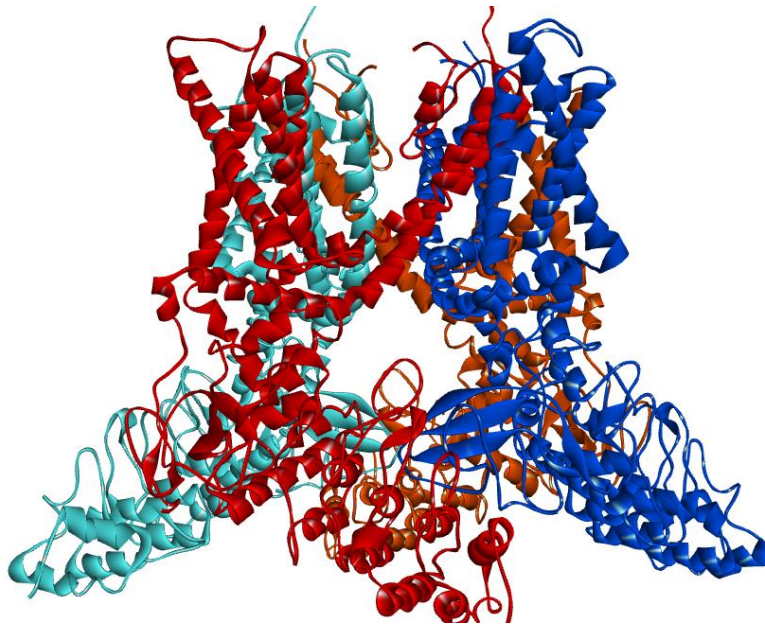

*Supplementary Figure 1.* Ribbon diagram of TRPV1 showing 4-fold symmetric architecture with each of the four identical subunits color-coded (polypeptide chains A-D: A is red, B is light blue, C is brown, and D is Dark blue). The solvent accessible surface area of TRPV1(PDB ID: 7LQZ). The figure was created by one of the authors using Biovia DS visualizer version 2017 after downloading PDB file (ID 7LQZ).
